# Supplementary material
Source: PubMed Central journal article supplement (PMC520957)
Supplement: plntcell_tpc.104.024869_1.pdf [file plntcell_tpc.104.024869_1.pdf]

**Supplemental Table 1 CAPS markers spanning the *HAN* region that detect polymorphisms between *Wassilewskija* (*Ws*) and *Columbia* (*Col*)**

| <b>Marker name</b> | <b>Enzyme</b>   | <b>Ws (bp)</b>  | <b>Col (bp)</b> | <b>Forward primer</b><br><b>Reverse primer</b>             |
|--------------------|-----------------|-----------------|-----------------|------------------------------------------------------------|
| F2K15-BstF5I       | BstF5I          | 410,370,230,200 | 600,410,200     | gtctctcaacaagtggcttgaatc<br>gaactacaatggactcagactgtgat     |
| F2K15-XbaI         | XbaI            | 210             | 260             | ctatgattcatttattggatgttttcta<br>gactgtgattttcccacggataagat |
| T16K5-MwoI         | MwoI            | 207             | 230             | ctccaccagcaggtagcctccacc<br>ccttccatgaagcctcctgaatccttc    |
| T16K5-RV           | EcoRv           | 135             | 26              | gcacaaggctatcctccaccgcgata<br>ccttccatgaagcctcctgaatccttc  |
| F3A4               | No cutting req. | 500             | 475             | gtagagaggatcagatacaattgcct<br>gagcttcaaaaggcttgcctaaga     |
| T20E23-MnlI        | MnlI            | 220             | 175, 50         | gctccttggtgactctatcgggtca<br>gattccagctactccagaagattc      |
| T3A5-TaqI          | TaqI            | 524, 443,207    | 524, 404, 207   | cgttgacaccgttaacgtagtctgt<br>ctgcggcgagactctacatcttca      |
| F18B3-RSAI         | RSAI            | 290             | 320             | ctccggttcgaaaactgtgatccgta<br>catacacatctgaatcttgctagagt   |
